# Supplementary material for: A leaky mutation in CD3D differentially affects αβ and γδ T cells and leads to a Tαβ–Tγδ+B+NK+ human SCID
Source: JCI journal article supplement (doi:10.1172/jci44254), 2011-09-19
Supplement: sd1 [file 1]

## SUPPLEMENTAL TABLES

**Supplemental Table 1. Human TCR complex deficiencies<sup>A</sup>**

|                |                          |      |        | References   |              | Number of patients |                |
|----------------|--------------------------|------|--------|--------------|--------------|--------------------|----------------|
| Protein        | Gene                     | Chr. | OMIM   | Complete     | Leaky        | Complete           | Leaky          |
| CD3 $\gamma$   | <i>CD3G</i>              | 11   | 186740 | 1            |              | 5                  |                |
| CD3 $\delta$   | <i>CD3D</i>              | 11   | 186790 | 2,3,4        | <sup>B</sup> | 7                  | 2 <sup>B</sup> |
| CD3 $\epsilon$ | <i>CD3E</i>              | 11   | 186830 | 3            | 5            | 3                  | 1              |
| TCR $\zeta$    | <i>CD247</i>             | 1    | 186780 | 6            | 7            | 1                  | 1              |
| TCR $\alpha$   | <i>TRAC</i> <sup>C</sup> | 14   | 186880 | 8            |              | 2                  |                |
|                |                          |      |        | <b>Total</b> |              | <b>18</b>          | <b>4</b>       |

<sup>A</sup> Classified as complete or leaky according to the effect of the mutations. Leaky, but not complete, mutations allow for the synthesis of low amounts of the wild type protein.

<sup>B</sup> Present manuscript. The GenBank accession no. for the cDNA and genomic DNA mutant sequences are JN392069 and JN392070, respectively.

<sup>C</sup> TCR $\alpha$  constant gene segment.

**Supplemental Table 2. Primers used for RT-PCR<sup>A</sup>**

| Gene         | Primer | Sequence (5' to 3')                  |
|--------------|--------|--------------------------------------|
| <i>CD3G</i>  | CD3GF  | AAAAAGAATTCTCAATTCCTCCTCAACTC        |
|              | CD3GR  | AAAAAGGATCCATGGAACAGGGGAAGGG         |
| <i>CD3D</i>  | CD3DF  | CTGTAGGAATTCACGATGGAACATAGCACGTTTCTC |
|              | CD3DR  | CTAGCTCTCGAGTCACTTGTTCCGAGCCCAGTT    |
| <i>CD3E</i>  | CD3EF  | TTCCTGTGTGGGGTTCAGAAACC              |
|              | CD3ER  | CCATCAGGCTGAGGAACGATTCT              |
| <i>CD247</i> | CD247F | CTGAGGGAAAGGACAAGATGAAG              |
|              | CD247R | AAAGAGTGCAGGGACAACAGTCT              |

<sup>A</sup> OLIGO Primer Analysis Software version 7 from Molecular Biology Insights was run for the following gene sequences (GenBank accession no.): *CD3G* (NM\_000073), *CD3D* (NM\_000732), *CD3E* (NM\_000733) and *CD247* (NM\_000734.3).

**Supplemental Table 3. Primers used for genomic PCR (exons+flanking introns)<sup>A</sup>**

| Gene        | Exon | Sequence (5' to 3')     |                           |
|-------------|------|-------------------------|---------------------------|
|             |      | Forward                 | Reverse                   |
| <i>CD3D</i> | 1    | AGCTCTCACCCAGGCTGATAGT  | AAGCTCTGGGATTACTGGTGTGA   |
|             | 2    | TGAGCTTCCGCAGAACAAAGG   | CACATCCAGAAGCCCTATCCATT   |
|             | 3    | AGGATGGTTCCTGATCTTAAAGG | CACTCTCATGCTCTGCTCTTCCA   |
|             | 4-5  | GGTGGATCTCACAGTCCCATCT  | TATATTTATTGGCTGAGCAAGAAGG |

<sup>A</sup> OLIGO Primer Analysis Software version 7 from Molecular Biology Insights was run for *CD3D* (NG\_009891.1)

**Supplemental Table 4. Primers and probes used for quantitative PCR<sup>A</sup>**

| Gene            | Primer/Probe | Sequence (5' to 3')                          |
|-----------------|--------------|----------------------------------------------|
| <i>CD3DWT</i>   | Forward      | AGGACAAAGAATCTACCGTGCAA                      |
|                 | Reverse      | CACGGTGGCTGGATCCA                            |
|                 | Probe        | ATTATCGAATGTGCCAGAGC                         |
| <i>CD3DΔEx2</i> | Forward      | CGTTTCTCTCTGGCCTGGTACT                       |
|                 | Reverse      | CACGGTGGCTGGATCCA                            |
|                 | Probe        | ACCCTTCTCTCGCAAGTGTGCCAGA                    |
| <i>CD3E</i>     | Forward      | CAAGGCCAAGCCTGTGAC                           |
|                 | Reverse      | TCATAGTCTGGGTTGGGAACA                        |
|                 | Probe        | 49 (Universal ProbeLibrary for Human, Roche) |

<sup>A</sup> Primer Express 3.0 from Applied Biosystems was used for *CD3DWT* and *CD3DΔEx2*, and ProbeFinder version 2.40 for Human (Universal ProbeLibrary Assay Design Center) from Roche Applied Science was used for *CD3E*. Sequences as in Supplemental Table 2.

## SUPPLEMENTAL METHODS

### The S2 *Drosophila* cell reconstitution system

Schneider S2 cells were grown in Schneider's *Drosophila* medium and transfected using CellFectin (Invitrogen Life Technologies) as described (9). Expression vectors for CD3 $\epsilon$ , CD3 $\gamma$  and TCR $\zeta$  were generated as described (10) and for TCR $\alpha$ , TCR $\beta$ , CD3 $\delta$ ,  $\Delta$ Ex2 and  $\Delta$ Ex3 is explained below. After 24 h, protein expression was induced by addition of 1mM CuSO<sub>4</sub> for another 20 h. Subsequently, cells were either stained for flow cytometry or lysed as described (9, 10). For IP 3  $\mu$ g of antibody and 5  $\mu$ l of protein G-coupled Sepharose (GE Healthcare) was incubated with 300  $\mu$ l of cell lysate overnight at 4°C. Beads were washed 3 times in lysis buffer before standard SDS-PAGE and Western blotting.

### Generation of *Drosophila* expression vectors

The cDNAs of the proteins of interest were inserted into the *Drosophila* expression vector pRmHa-3 containing an inducible metallothionein promoter (11). pRmHa-3 is abbreviated as pD. The coding sequences of human WT CD3 $\delta$ ,  $\Delta$ Ex2 and  $\Delta$ Ex3 were cloned into the pD vector using EcoRI and XhoI restriction sites from the pIREShrGFPCD3DWT, pIREShrGFPCD3D $\Delta$ Exon2 and pIREShrGFPCD3D $\Delta$ Exon3 plasmids.  $\Delta$ Ex3 CD3 $\delta$  lacks the transmembrane region and is associated with severe  $\alpha\beta$  and  $\gamma\delta$  T lymphopenia and SCID (4). pDECPhPhTCR $\alpha$ HA1.7 and pDECPhPhTCR $\beta$  HA1.7, containing sequences that encode for an N-terminally ECFP-tagged HA-specific human TCR $\alpha$  or TCR $\beta$  chain, were derived from the plasmids pJ6omegaTCR $\alpha$ HA1.7 or pJ6omegaTCR $\beta$ HA1.7, respectively.

### Reconstruction of the TCR complex in *Drosophila* S2 cells

To study TCR assembly, we used the S2 *Drosophila* cell reconstitution system that allows co-transfection and expression of more than 5 different vectors (12). We had used this system previously to reconstruct assembly and surface transport of the BCR complex (13). Here, we firstly show that TCR $\alpha\beta$  dimers do not come to the S2 cell surface if expressed alone, whereas CD3 $\epsilon\delta$  and CD3 $\epsilon\gamma$  do (Supplemental Figure 4A). Co-expression of a CD3 dimer together with TCR $\alpha\beta$  leads to surface expression of TCR $\alpha\beta$ , showing that some aspects of TCR assembly and transport to the surface can

be studied using this system (Supplemental Figure 4B). Next, S2 cells were co-transfected with plasmids containing cDNAs of WT CD3 $\epsilon$  and WT CD3 $\delta$  or  $\Delta$ Ex2 or  $\Delta$ Ex3. CD3 proteins were IP from the lysates with a mAb specific for folded CD3 $\epsilon$  (OKT3) and a CD3 $\delta$ -specific antiserum (M20 $\delta$ ), separated by non-reducing SDS-PAGE and detected by CD3 $\delta$ - or CD3 $\epsilon$ -specific antisera by Western blotting (Supplemental Figure 4C).  $\Delta$ Ex2, but not  $\Delta$ Ex3, gave rise to a stable protein (bottom left panel) which was able to pair with CD3 $\epsilon$  (bottom right panel). The smallest  $\Delta$ Ex2 form might be a disulphide-linked dimer of nearly the same size as a WT CD3 $\delta$  monomer. CD3 $\epsilon$  of the  $\Delta$ Ex2-CD3 $\epsilon$  dimers was not folded correctly, since it was not recognized by OKT3 (upper panels), and was aberrantly disulphide bonded to  $\Delta$ Ex2 (lower left panel). Only WT CD3 $\delta$  produced CD3 $\delta\epsilon$  dimers that were recognized by IP using the mAb OKT3 (upper panels) and by flow cytometry using UCHT1 (Supplemental Figure 4D). Furthermore,  $\Delta$ Ex2 could not diminish expression of a TCR complex (Supplemental Figure 4E), although it was expressed at higher levels than WT CD3 $\delta$  (Supplemental Figure 4C bottom left). Therefore, the head-less CD3 $\delta$  did not efficiently compete with WT CD3 $\delta$  in the formation of a TCR complex. From these results we concluded that  $\Delta$ Ex2 was unlikely to impinge on  $\alpha\beta$ TCR assembly or surface expression in the patients' T cells.

### ***TCRB* clonality**

Clonality at the *TCRB* locus was studied using a commercial kit (Master Diagnostica, Granada, Spain, EC-certified for clinical use), which amplifies genomic TCR V $\beta$ J $\beta$  rearrangements using two primers specific for conserved V and J flanking regions. Polyclonal (normal donor) and monoclonal (Jurkat or MOLT3) control DNAs were included for reference. Amplimers were separated and analyzed in an ABI Prism Genetic Analyzer 3110 using GeneMapper V 4.0 from ABI.

SUPPLEMENTAL FIGURES

**Supplemental Figure 1. *CD3D* intron 2 5' splice donor site phylogeny.** Multiple alignment of DNA sequences of the gene region surrounding the IVS2+5G>A mutation (arrow) in several mammals (\*hominids) reveals that the location of the mutation is conserved. The equivalent location after the exon encoding the extracellular Ig domain is also conserved as a guanine in *CD3G* (not shown).

|           |   | Splice site ↓              |   |   |   |   |   |   |   |   |          |   |   |   |   |
|-----------|---|----------------------------|---|---|---|---|---|---|---|---|----------|---|---|---|---|
| Primates  | { | <i>Homo sapiens*</i>       | C | G | A | A | g | t | a | c | <b>g</b> | t | g | c | t |
|           |   | <i>Pan troglodytes*</i>    | - | - | - | - | - | - | - | - | -        | - | - | - | - |
|           |   | <i>Macaca mulatta</i>      | - | - | - | - | - | - | - | t | -        | - | - | - | - |
|           |   | <i>Macaca fascicularis</i> | - | - | - | - | - | - | - | t | -        | - | - | - | - |
| Rodents   | { | <i>Mus musculus</i>        | - | - | - | - | - | - | - | - | t        | - | - | - | - |
|           |   | <i>Ratus norvergicus</i>   | - | - | - | - | - | - | - | - | t        | - | - | - | t |
| Horses    | [ | <i>Equus caballus</i>      | - | - | - | - | - | - | - | - | t        | - | - | - | c |
| Ruminants | [ | <i>Bos taurus</i>          | - | - | - | - | - | - | - | - | t        | - | - | - | - |

**Supplemental Figure 2. Genetic pedigrees and *CD3* haplotype analysis.** Genetic pedigrees of the two families with the *CD3D* mutation. Circles indicate females, squares indicate males (slashed when deceased). Solid symbols denote homozygosity for the mutation, half-solid symbols heterozygosity. *CD3* haplotypes under each symbol are based on the indicated polymorphic markers spanning the *CD3GDE* region on chromosome 11q23. The disease-associated chromosomes are depicted in black with the shared core haplotype markers in red. No genotyping inconsistencies were found. The relative order and the physical distances of markers are as previously reported (1). The allele sizes are normalized with respect to individual 134702, available from Center d’Etude du Polymorphisme Humain (14).

**Family A**

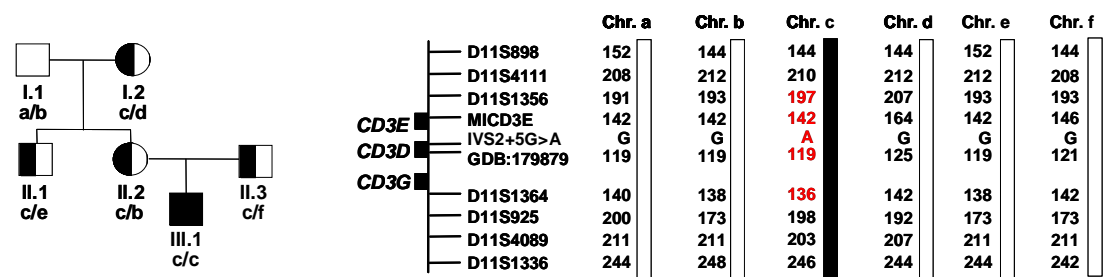

**Family B**

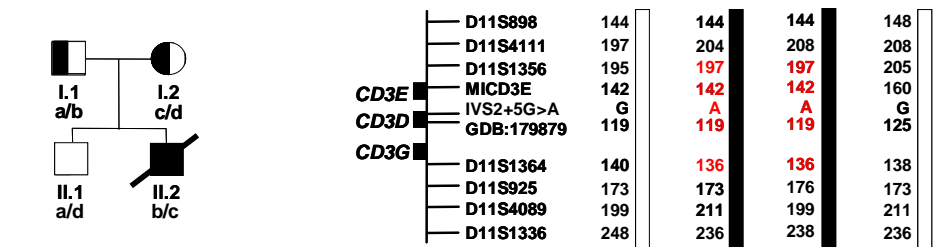

**Supplemental Figure 3. TCR complex expression in cultured T cells from patients (dashed lines) or controls (solid lines).** (A) Lymphocytes were fixed with 2% paraformaldehyde at  $3 \times 10^6$  cells/ml for 1 hour at 4°C, permeabilized using 0.2% saponin for 15 minutes at room temperature and stained with APA1/2 (anti-human CD3 $\delta$  cytoplasmic tail mAb, 15) followed by anti-mouse IgG-PE (Beckman Coulter). WT Jurkat cells were compared with CD3 $\delta$  knock-down (KD) cells using a specific shRNA for CD3 $\delta$  RNA which showed a 90% reduction in CD3 $\delta$  by Western blotting (right, shCD3 $\delta$  3). The numbers in each histogram indicate the MFI ratios between control and patient or KD. (B) Lymphocytes were surface-stained with the indicated TCR- or CD3-specific mAb and analyzed comparatively within the indicated gates. T $\alpha\beta$  cells were defined as BMA031 $^{+}$ , CD3 $^{+}$ IMMU510 $^{-}$  or WT31 $^{+}$ , whereas T $\gamma\delta$  cells were defined as IMMU510 $^{+}$ . Histogram numbers as in A.

## A Intracellular CD3 $\delta$ expression

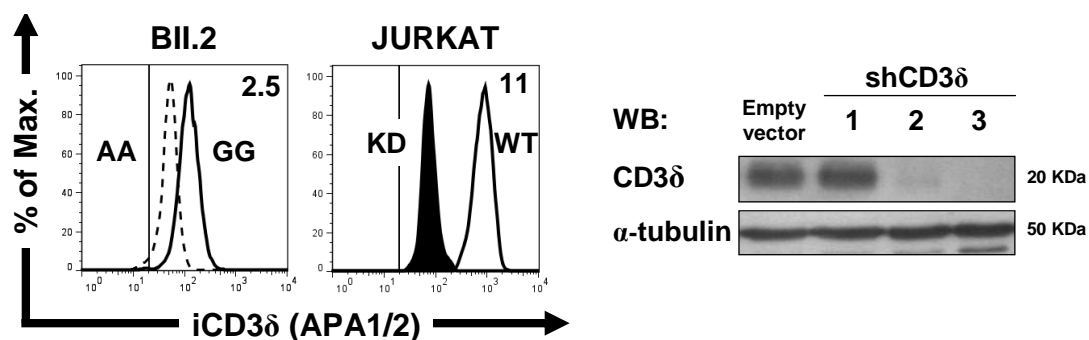

## B Surface expression

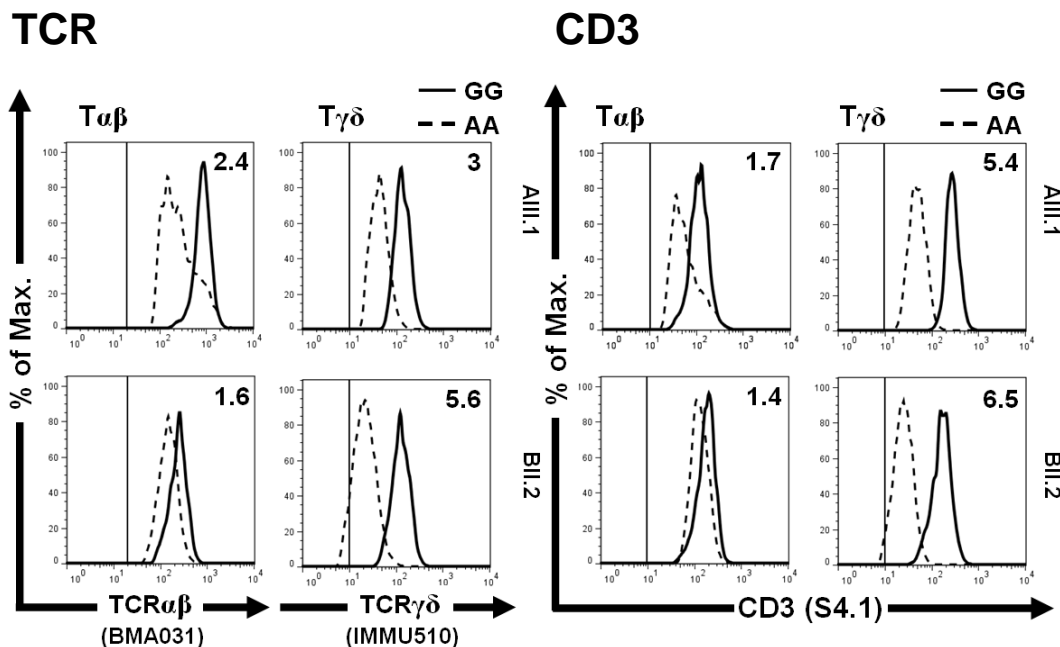

**Supplemental Figure 4. Reconstruction of the TCR complex in *Drosophila* S2 cells (A, B, C) to show that  $\Delta$ Ex2 does not compete with WT CD3 $\delta$  to form a TCR complex (D, E). Refer to Supplemental Methods for details.**

(A) *Drosophila* S2 cells were transiently transfected with expression plasmids encoding for the indicated proteins or with the empty plasmid (-). After induction with copper sulfate, cells were stained first extracellularly and then after permeabilisation with saponin intracellularly with anti-TCR $\beta$  (Jovi1, left panels) or anti-folded CD3 $\epsilon$  (UCHT1, right panel) antibodies and measured by flow cytometry. (B) Summary of the expression of TCR $\alpha\beta$  (column “ $\alpha\beta$ ”) or CD3 (column “ $\epsilon$ ”) on the *Drosophila* S2 cell surface after co-expression of the TCR or CD3 subunits indicated in the left column. Experiments were done as in A) using mouse or human expression plasmids as indicated. - : no expression on the cell surface; + : low and ++ : high expression on the cell surface. As a control, all human TCR and CD3 subunits were expressed as seen by Western blotting (data not shown). Co-expression of a CD3 dimer together with TCR $\alpha\beta$  leads to surface expression of TCR $\alpha\beta$ , which was not enhanced upon transfection of all six TCR and CD3 subunits. (C) S2 *Drosophila* cells were transiently transfected with expression plasmids encoding for the indicated proteins (lanes 1-4 and 6) or with the empty plasmid (lane 5). After induction with copper sulfate, the lysates (lowest panel) or anti-folded CD3 $\epsilon$  or anti-CD3 $\delta$  IP (OKT3, upper panels, or M20 $\delta$ , lower panels, respectively) were separated by non-reducing SDS-PAGE. Western blotting was performed with anti-CD3 $\delta$  (M20 $\delta$ , left panels) or anti-CD3 $\epsilon$  (M20 $\epsilon$ , right panels) antibodies and the ECL system. (D) S2 cells were transiently transfected with expression plasmids encoding for the indicated proteins. After induction with copper sulfate, cells were stained with the anti-TCR $\beta$  antibody Jovi3 and measured by flow cytometry. (E) S2 cells were transiently transfected with expression plasmids encoding for the indicated proteins (coloured lines) or with the empty plasmid (black lines). After induction with copper sulfate, cells were stained with the anti-folded CD3 $\epsilon$  antibody UCHT1 and measured by flow cytometry.



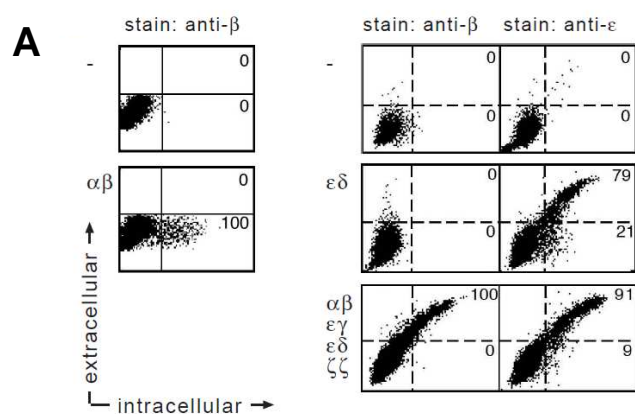

**B**

| co-expression                                          | mouse         |            | human         |            |
|--------------------------------------------------------|---------------|------------|---------------|------------|
|                                                        | $\alpha\beta$ | $\epsilon$ | $\alpha\beta$ | $\epsilon$ |
| $\alpha\beta$                                          | -             | -          | -             | -          |
| $\epsilon\gamma$                                       | -             | ++         | -             | ++         |
| $\epsilon\delta$                                       | -             | ++         | -             | ++         |
| $\alpha\beta \epsilon$                                 | -             | -          | -             | -          |
| $\alpha\beta \gamma$                                   | -             | -          | -             | -          |
| $\alpha\beta \delta$                                   | -             | -          | -             | -          |
| $\alpha\beta \epsilon\gamma$                           | ++            | ++         | +             | +          |
| $\alpha\beta \epsilon\delta$                           | ++            | ++         | ++            | ++         |
| $\alpha\beta \zeta\zeta$                               | -             | -          | -             | -          |
| $\alpha\beta \epsilon\gamma \epsilon\delta$            | ++            | ++         | ++            | ++         |
| $\alpha\beta \epsilon\gamma \epsilon\delta \zeta\zeta$ | ++            | ++         | ++            | ++         |

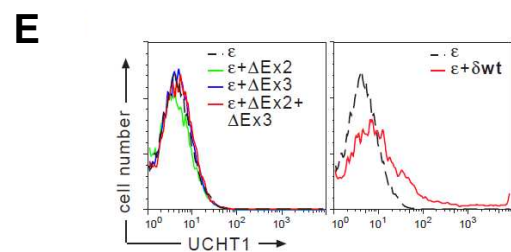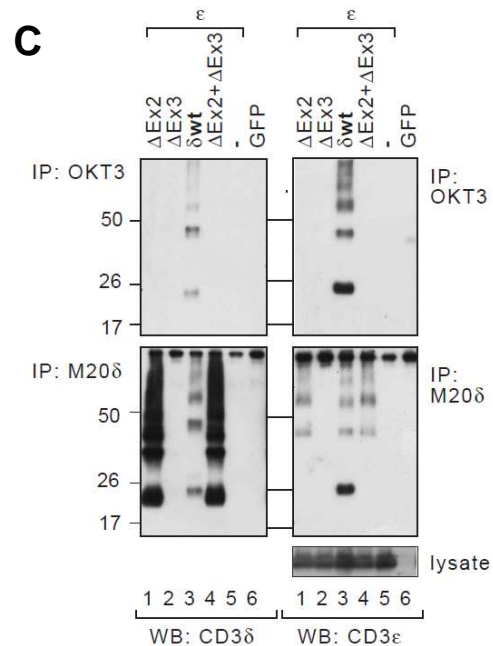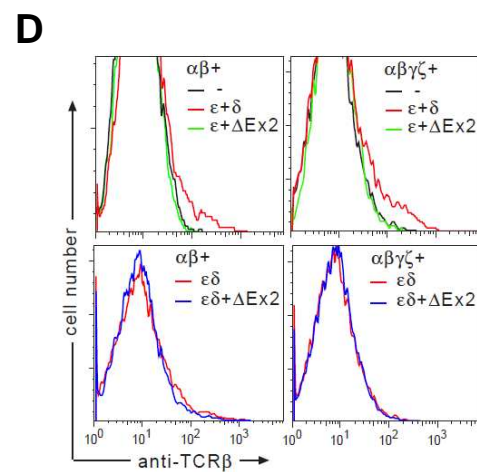

**Supplemental Figure 5. T $\alpha\beta$  lymphocyte subset numbers.** Absolute CD4<sup>+</sup> and CD8<sup>bright</sup> cell numbers in patients (AIII.1 dots, BII.2 triangles) plotted as a function of age in comparison with the normal age-matched distribution (P5, P50 and P95, 16).

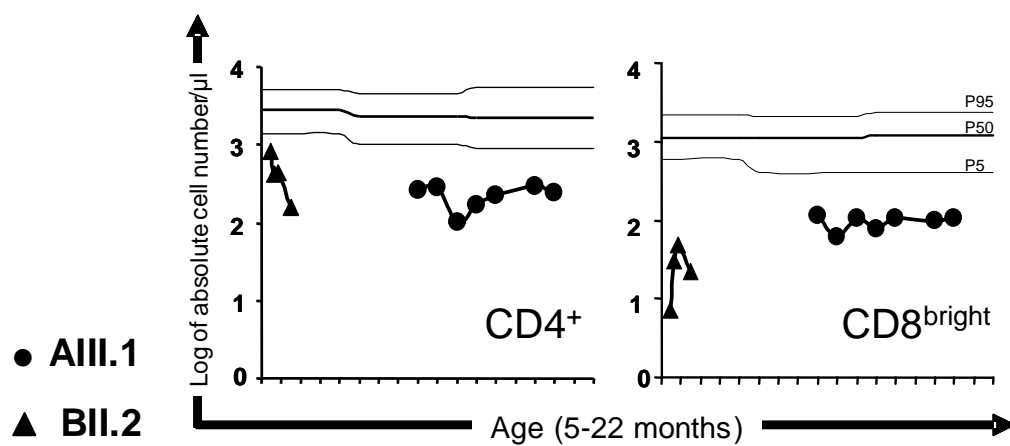

**Supplemental Figure 6. TCR complex function.** (A) TCR down-regulation after 24 hours in response to anti-CD3 stimulation in primary T $\alpha\beta$  (CD4<sup>+</sup>) or T $\gamma\delta$  (11F2<sup>+</sup>) lymphocytes with the indicated *CD3D* IVS2+5 genotypes. The numbers in each histogram indicate CD3 MFI percentages of stimulated (dashed lines) relative to unstimulated cells (solid lines). (B) CD69 induction (% expression) in T cell lines from the indicated donors after stimulation with different amounts of UCHT-1 for 24 hours. (C) CD25 induction after 36 hours in stimulated (dashed lines) compared to unstimulated (solid lines) primary CD4<sup>+</sup> T cells (mostly T $\alpha\beta$  cells). The numbers in each histogram indicate MFI increments normalized to control cell increments. (D) Lymphocyte proliferation was evaluated by flow cytometry using CFSE dye dilution (17). CFSE-labeled peripheral blood lymphocytes were cultured for 5 days in the presence (+) or absence (–) of phytohemagglutinin (PHA, left) or the anti-CD3 antibody UCHT-1 (right). Cells were analyzed for CFSE dilution by flow cytometry within the indicated subsets. In this experiment T $\alpha\beta$  and T $\gamma\delta$  lymphocytes were defined as CD4<sup>+</sup> (>98% T $\alpha\beta$  cells), and double negative CD3<sup>+</sup> (78±6% T $\gamma\delta$  cells) because the TCR was down-regulated after activation.

### A TCR down-regulation

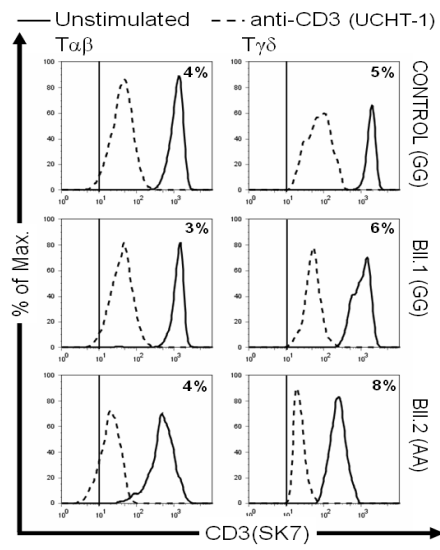

### B CD69 induction

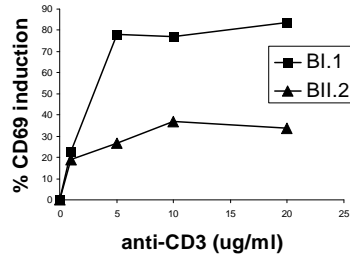

### C CD25 induction

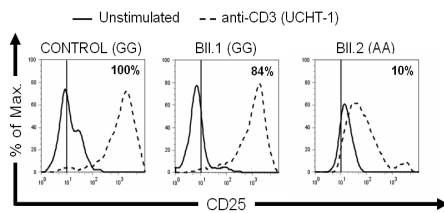

### D Lymphocyte proliferation

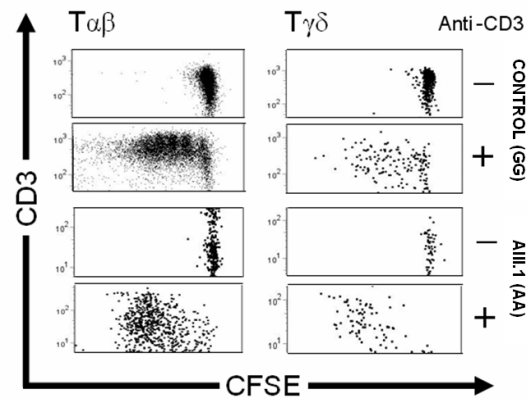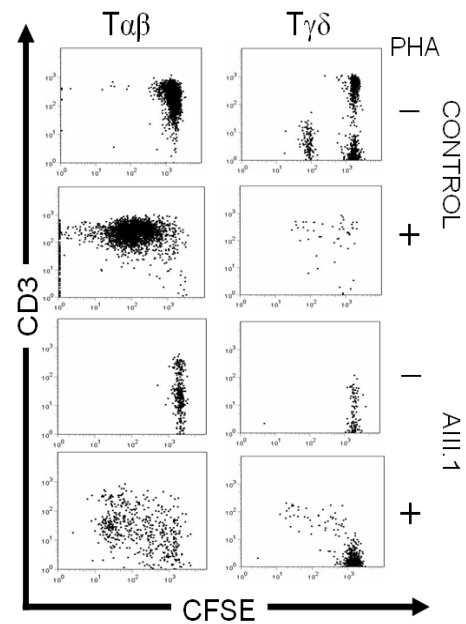

**Supplemental Figure 7. Thymus of patient AIII.1 at diagnosis** (chest CT scan). Patient AIII.1 showed a thymus of 2.39 x 1.8 cm (1 and 2 in image, respectively), within the normal age-matched dimensions  $\pm$  SD of  $3.13 \pm 0.85 \times 2.52 \pm 0.82$  (18). In patient BII.2 the thymus was initially not detected by CT scan, but his necropsy revealed the presence of a thymus remnant of 2 x 1 cm.

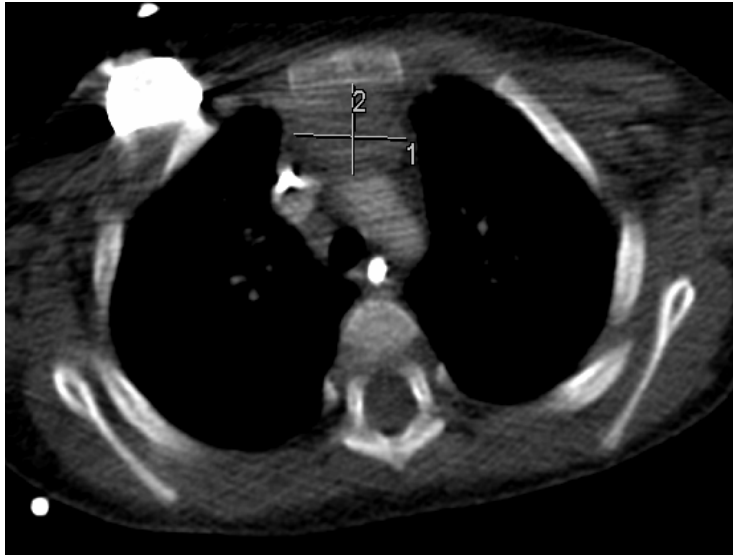

**Supplemental Figure 8. T lymphocyte phenotype in the patients to a normal age-matched control.** (A) Recent thymic emigrants defined as  $CD4^+CD45RA^+CD31^+$  T cells (19). (B)  $CD45RA^+$  (naïve) and  $CD45RO^+$  (memory) T lymphocytes. (C) CD25 expression in patients with *CD3D* IVS2+5 AA genotype (dashed lines) in comparison with controls (GG, solid lines) in  $T\alpha\beta$  cells defined as  $CD4^+$  and in  $T\gamma\delta$  cells defined as  $11F2^+$ .

### A Recent $CD4^+$ thymic emigrants

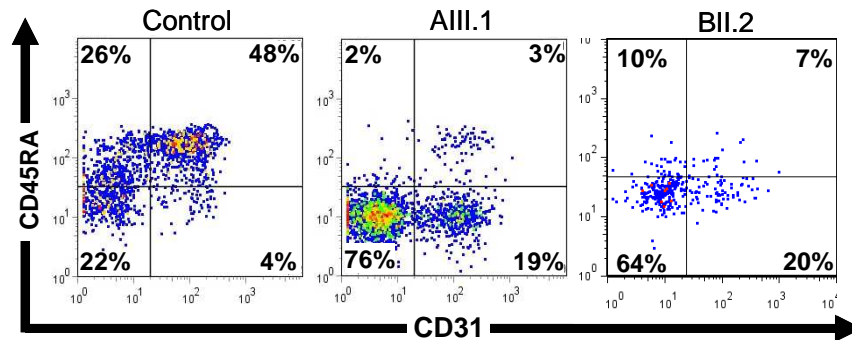

### B $CD45RA^+/CD45RO^+$ T lymphocytes

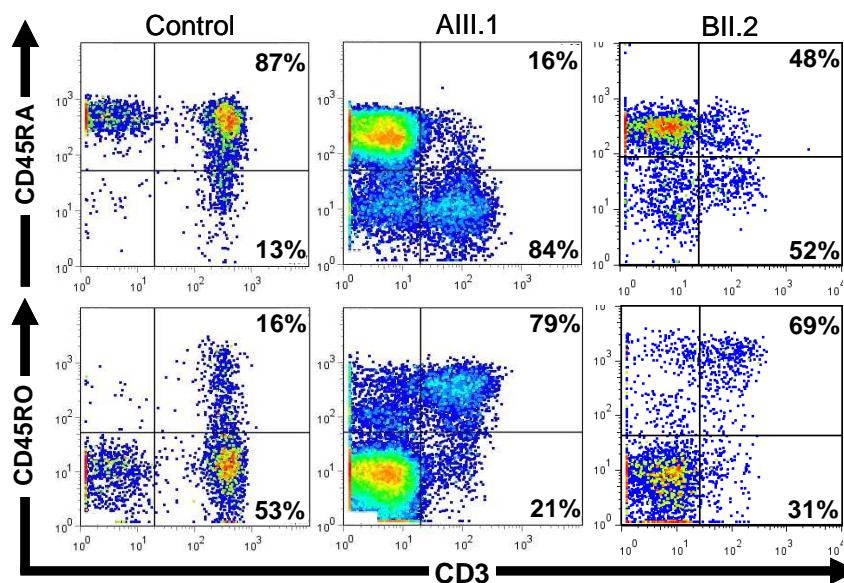

### C CD25 expression

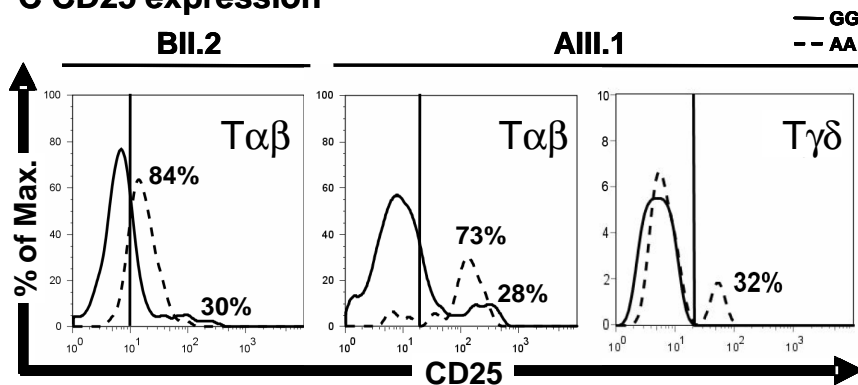

**Supplemental Figure 9A. *TCRB* clonality.** Genomic *TCR V $\beta$ J $\beta$*  rearrangements were amplified in the patients using two different primer sets (VBJB-A and -B) and compared with a normal (polyclonal) donor and two tumoral T cell lines (monoclonal) in the 240-280 bp range. The two primer sets are specific for conserved V and J flanking regions, and therefore amplify genomic *TCR V $\beta$ J $\beta$*  rearrangements as fragments of the indicated size range (see Supplemental Methods in page 4). Normal T lymphocytes are polyclonal and thus show a Gaussian fragment distribution (POLYCLONAL in Figure). T lymphoid tumors such as Jurkat or MOLT3 are monoclonal and thus yield a single major peak (MONOCLONAL in Figure). Patients with poor *TCR $\beta$*  diversity show few peaks without Gaussian distribution.

## A *TCRB* clonality

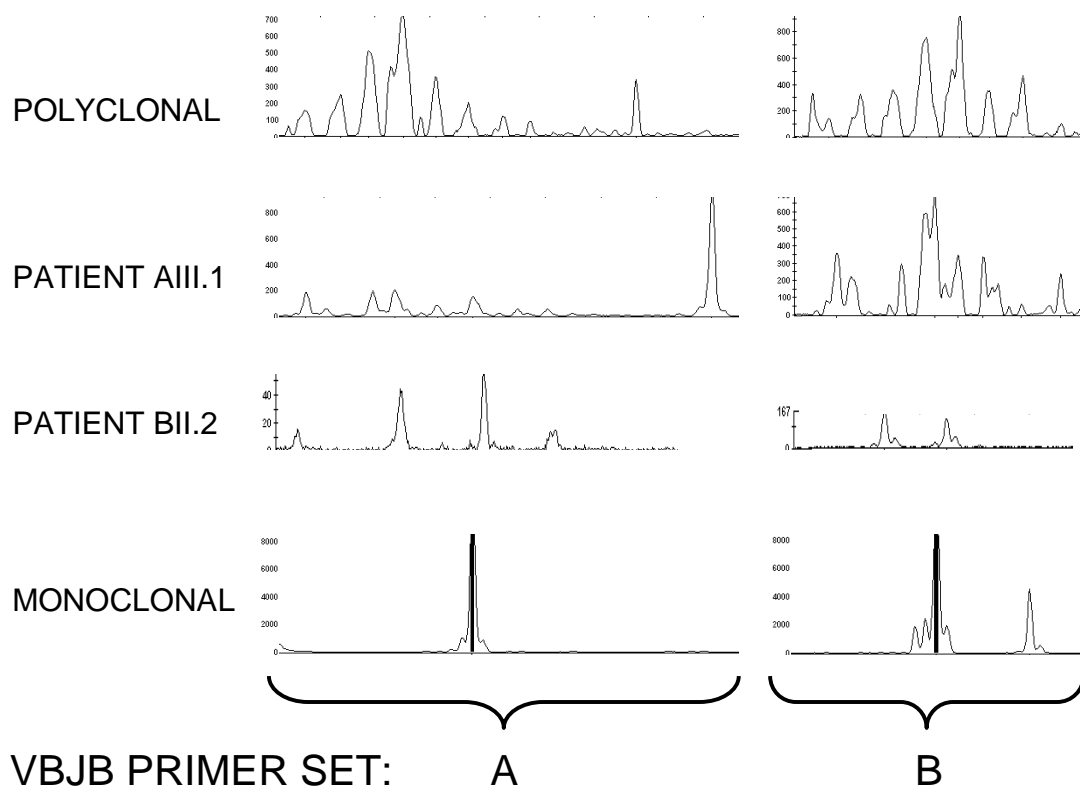

**Supplemental Figure 9B. TCRV $\beta$  repertoire within CD4<sup>+</sup> and CD8<sup>+</sup> T populations by flow cytometry using a collection of anti-TCR V $\beta$  antibodies from Beckman Coulter Immunotech. Data are shown within range (green) or out of range (red) (black, not done) in comparison with a normal age-matched control (empty bars) and the normal range (grey bars  $\pm$  SD, 20).**

## B TCR V $\beta$ repertoire within T lymphocyte subsets

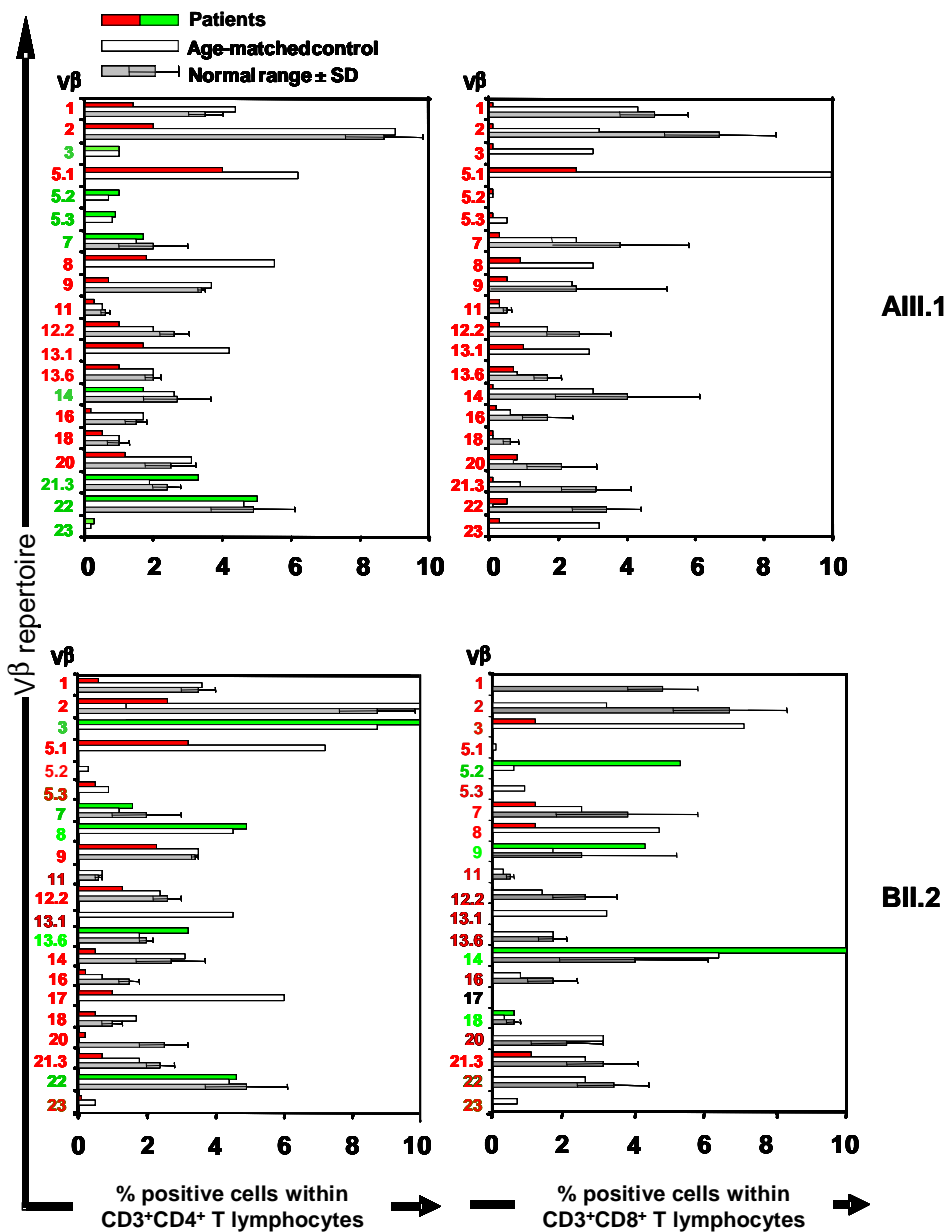



## SUPPLEMENTAL REFERENCES

1. Recio MJ, et al. Differential biological role of CD3 chains revealed by human immunodeficiencies. *J Immunol.* 2007;178(4):2556-64.
2. Dadi HK, Simon AJ, Roifman CM. Effect of CD3delta deficiency on maturation of alpha/beta and gamma/delta T-cell lineages in severe combined immunodeficiency. *N Engl J Med.* 2003;349(19):1821-28.
3. de Saint Basile G, et al. Severe combined immunodeficiency caused by deficiency in either the delta or the epsilon subunit of CD3. *J Clin Invest.* 2004; 114(10):1512-17.
4. Takada H, Nomura A, Roifman CM, Hara T. Severe combined immunodeficiency caused by a splicing abnormality of the CD3delta gene. *Eur J Pediatr.* 2005;164(5):311-14.
5. Soudais C, Villartay J P, Deist F L, Fischer A, Lisowska-Grospierre B. Independent mutations of the human CD3-epsilon gene resulting in a T cell receptor/CD3 complex immunodeficiency. *Nat Genet* 3:77-81, 1993
6. Roberts JL, et al. T<sup>B</sup><sup>+</sup>NK<sup>+</sup> severe combined immunodeficiency caused by complete deficiency of the CD3zeta subunit of the T-cell antigen receptor complex. *Blood.* 2007;109(8):3198-206.
7. Rieux-Laucat F, Hivroz C, Lim A, et al. Inherited and somatic CD3zeta mutations in a patient with T-cell deficiency. *N Engl J Med* 2006; 354: 1913-21.
8. Morgan NV, et al. Mutation in the TCR $\alpha$  subunit constant gene (TRAC) leads to a human immunodeficiency disorder characterized by a lack of TCR $\alpha\beta$ <sup>+</sup> T cells. *J Clin Invest.* 2011;121(2):695-702.
9. Swamy M, Kulathu Y, Ernst S, Reth M, Schamel WW. Two dimensional Blue Native-/SDS-PAGE analysis of SLP family adaptor protein complexes. *Immunol Lett.* 2006;104(1-2):131-7.
10. Dopfer EP, et al. Analysis of novel phospho-ITAM specific antibodies in a S2 reconstitution system for TCR-CD3 signalling. *Immunol Lett.* 2010;130(1-2):43-50.
11. Bunch TA, Grinblat Y, Goldstein LS. Characterization and use of the Drosophila metallothionein promoter in cultured Drosophila melanogaster cells. *Nucleic Acids Res.* 1988;16(3):1043-61.
12. Rolli V, et al. Amplification of B cell antigen receptor signaling by a Syk/ITAM

- positive feedback loop. *Mol Cell*. 2002;10(5):1057-69.
13. Schamel WW, Kuppig S, Becker B, Gimborn K, Hauri HP, Reth, M. A high molecular weight complex of BAP29/BAP31 is involved in the retention of membrane-bound IgD in the endoplasmic reticulum. *Proc Natl Acad Sci*. 2003; 100(17):9861-66.
  14. Dib C, et al. A comprehensive genetic map of the human genome based on 5,264 microsatellites. *Nature*. 1996;380(6570):152-4.
  15. Alarcón A, et al. The CD3 $\gamma$  and CD3 $\delta$  subunits of the T cell antigen receptor can be expressed within distinct functional TCR/CD3 complex. *EMBO J*. 1991;10(4): 903-12.
  16. Comans-Bitter WM, et al. Immunophenotyping of blood lymphocytes in childhood. Reference values for lymphocyte subpopulations. *J Pediatr*. 1997; 130(3):388-93.
  17. Lyons AB. Analysing cell division in vivo and in vitro using flow cytometric measurement of CFSE dye dilution. *J Immunol Methods*. 2000;243(1-2):147-54.
  18. Francis IR, Glazer GM, Bookstein FL, Gross BH. The thymus: Reexamination of age-related changes in size and shape. *AJR Am J Roentgenol*. 1985;145(2): 249-54.
  19. Kohler S, Thiel A. Life after the thymus: CD31<sup>+</sup> and CD31<sup>-</sup> human naïve CD4<sup>+</sup> T-cell subsets. *Blood*. 2009;113(4):769-74.
  20. van den Beemd R, et al. Flow Cytometric Analysis of the V $\beta$  Repertoire in Healthy Controls. *Cytometry*. 2000;40(4):336-45.
